# Supplementary material
Source: Springer Nature journal article supplement (https://www.springermedizin.de/resource/supplementary/13058_2011_2723_MOESM2_ESM.pdf/9702410)

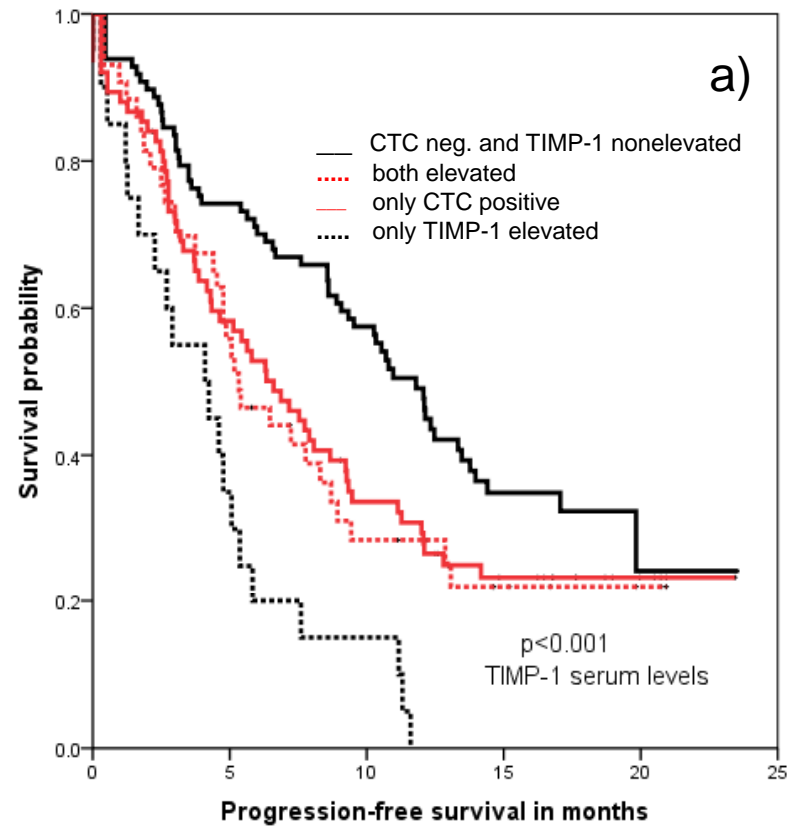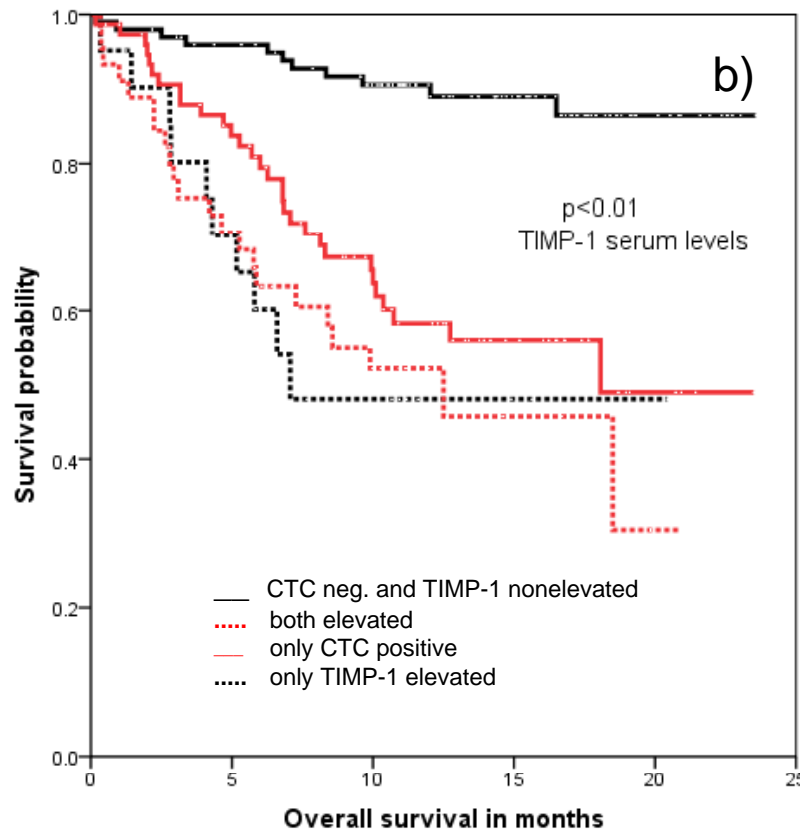

Supplement: MOESM2 [file 9702410]
